# Supplementary material
Source: publisher figshare collection journal article supplement (https://karger.figshare.com/articles/dataset/_/5363539)
Supplement: Supplementary file 1 [file 1]

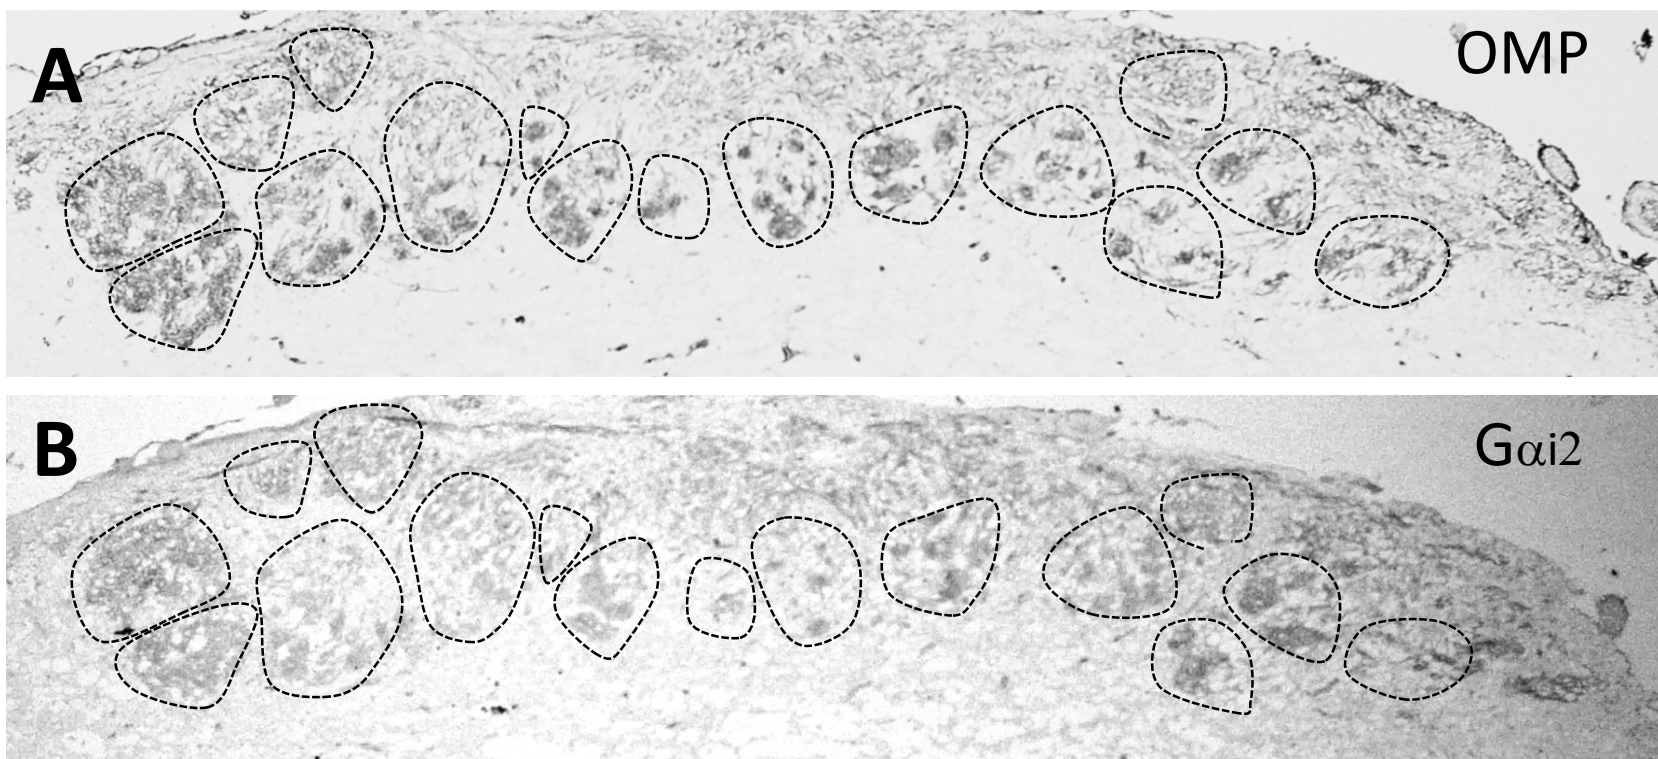

**Supplemental Fig. 1.**

High magnifications of anti-OMP (A) and anti-Gαi2 (B) immunoreactivity in GL of AOB, corresponding to panels (Fig. 3 A and G, respectively). Sixteen glomeruli (dashed circles) are positive for both anti-OMP and anti-Gαi2.
